# Supplementary material for: Man-made textile fibres from pectin
Source: Royal Society of Chemistry journal article supplement (doi:10.1039/d5su00048c), 2025-01-01
Supplement: d5su00048c1.pdf [file d5su00048c1.pdf]

## Man-made textile fibres from pectin

Aleksandra Maria Kozłowski,<sup>a</sup> Kristina E Lindgren,<sup>a</sup> Gino Mangiante,<sup>b</sup> and Tobias Köhnke<sup>a</sup>

<sup>a</sup> RISE Research Institutes of Sweden, Materials and Production, Argongatan 30, 431 53 Mölndal, Sweden

<sup>b</sup> Product & Process Development Center, Cargill Starches Sweeteners & Texturizers, 50500, Carentan, France

### Supplementary Information

#### Rheological analysis of spinning dope

Dissolved pectin was studied using a stress-controlled rheometer Nova (Rheologica Instruments AB, Sweden), equipped with a concentric cylinder geometry and measurement system for Elevated Temperature Cell (ETC) with C 40/4 cone (diameter = 40 mm). Before analysis, the sample was filtered through a 20  $\mu\text{m}$  mesh filter on a centrifuge (10 min/ 7000 rpm). To determine the linear viscoelastic regimes, stress sweeps were performed in the range from  $10^{-4}$  to  $10^2$  Pa at a frequency of 1 Hz. Then, the frequency sweeps in the range from  $10^{-2}$  to  $10^2$  Hz were executed in the linear viscoelastic regimes to determine the values of complex viscosity and dynamic moduli. The measurements were performed at the following temperatures: 23, 30, 40, 50, and 60  $^{\circ}\text{C}$ . Samples were secured with silicon oil, to minimise the drying effect during the analysis. The results of the conducted analysis are presented below, in Figure S-1.

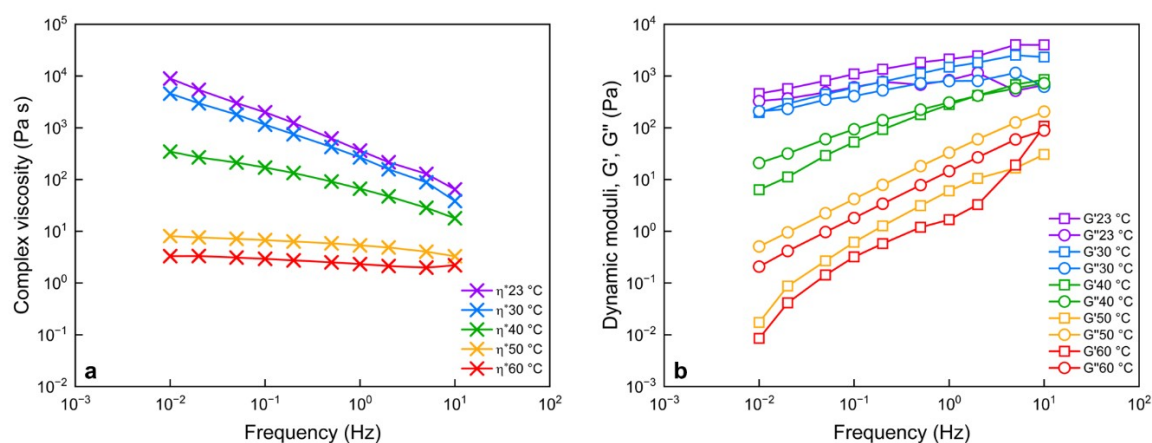

Figure S- 1. The summary of rheological properties, i.e., a) complex viscosities and b) dynamic moduli of 6 % (w/w) 33% DM pectin dope dissolved at pH 3 and analysed at the range of temperatures.

## Spinning process

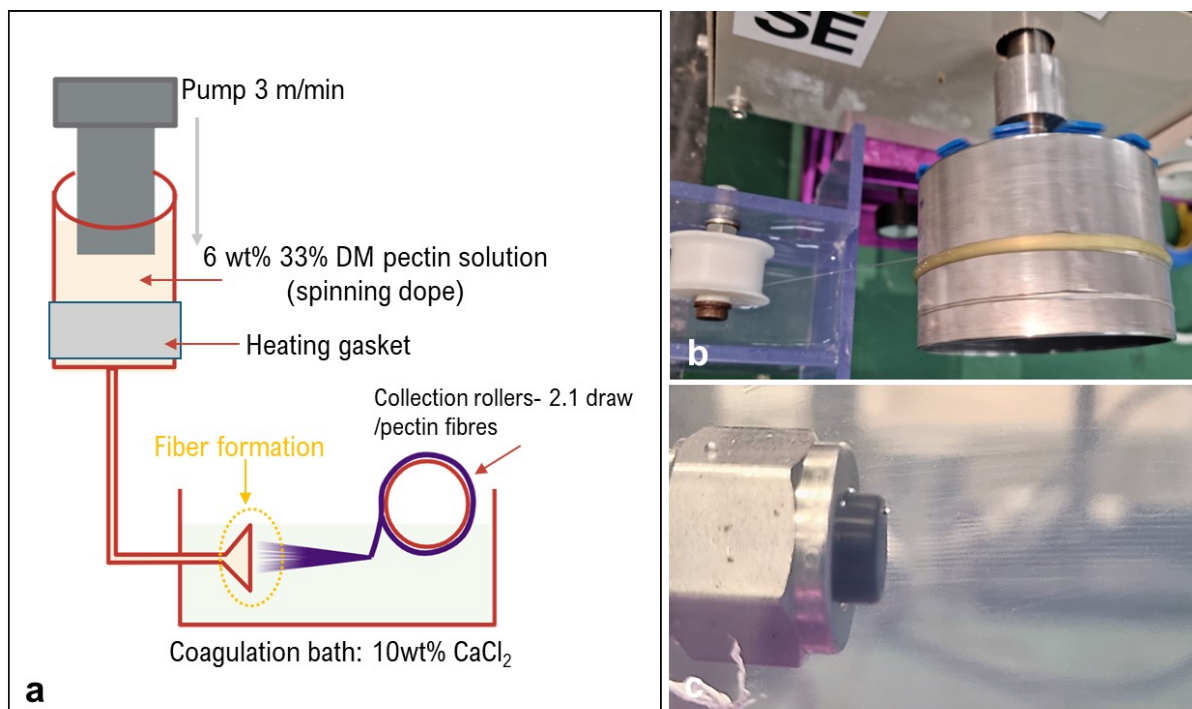

Figure S- 2. a) Sketch of wet spinning set-up to produce pectin fibres; b) picture of pick-up roller with pectin fibres collected from coagulation bath; c) picture of spinneret in the coagulation bath (extruded fibers are transparent; no clogging on spinneret surface).

## EtOH washed fibre

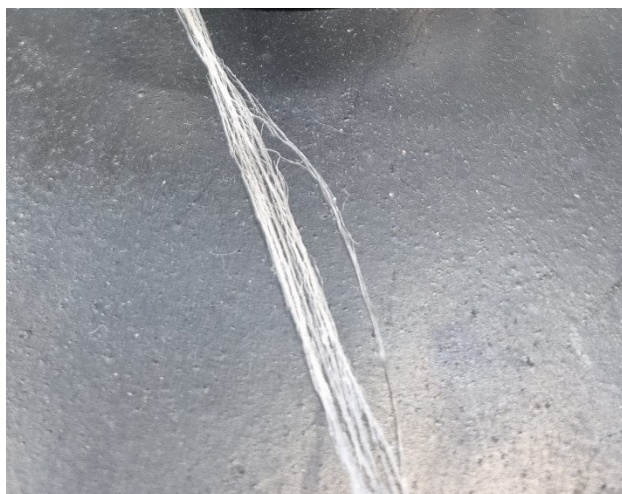

Figure S- 3. Picture of fused pectin fibre, spun from 6 % (w/w) 33% DM dope dissolved at pH 3, after washing with EtOH and drying (no conditioning).

**Morphology of washed fibres**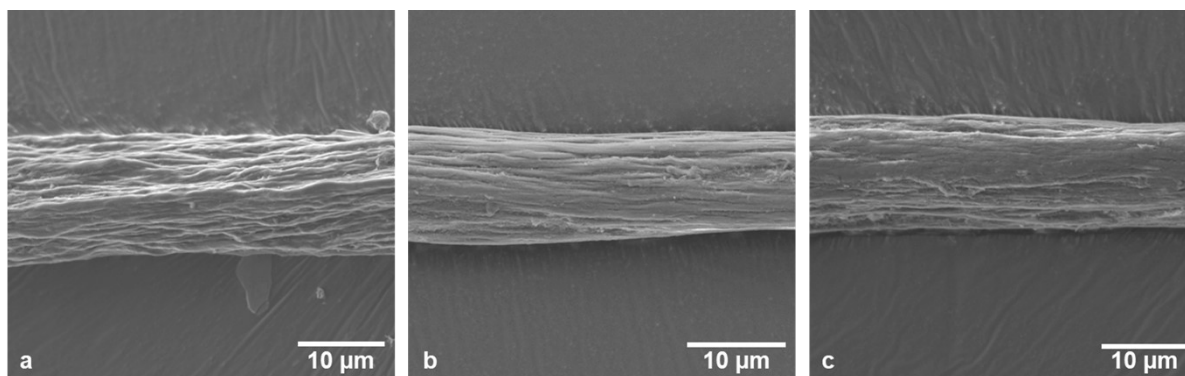

Figure S- 4. SEM assessment of the morphology of fibres spun from 6 % (w/w) 33% DM pectin dope dissolved at pH 3 and washed with a) dH<sub>2</sub>O, b) EtOH/H<sub>2</sub>O (2:1, w/w), and c) EtOH. All fibres were conditioned with 0.17% commercial surfactant.

**Orientation of washed fibres**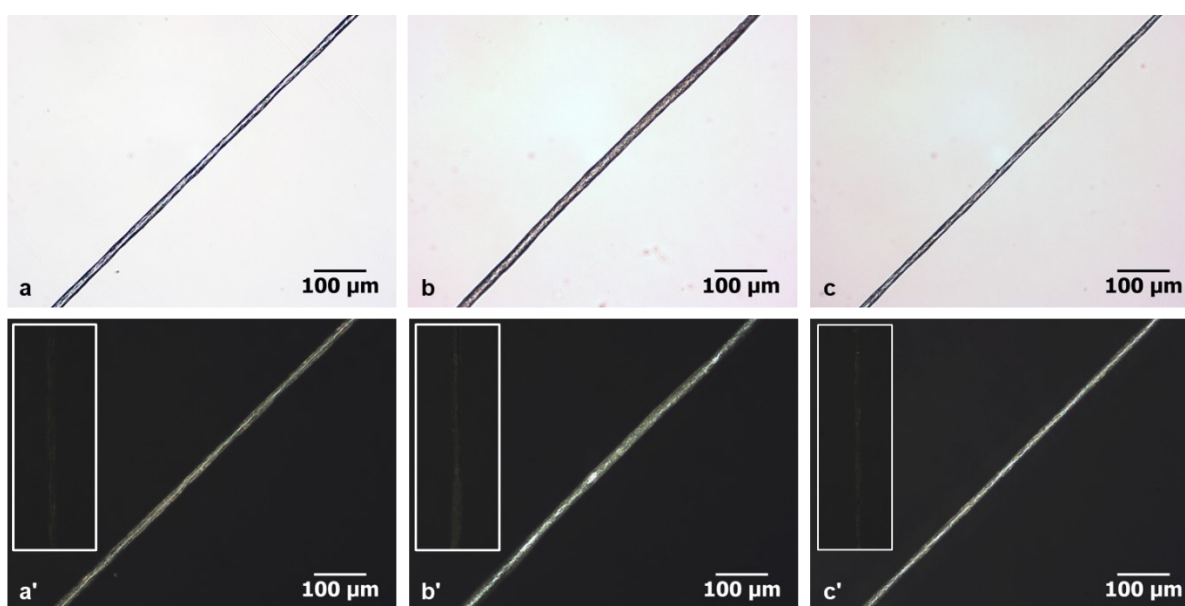

Figure S- 5. POM pictures to assess the orientation of fibres of fibres spun from 6 % (w/w) 33% DM pectin dope dissolved at pH 3 and washed with a/a') dH<sub>2</sub>O, b/b') EtOH/H<sub>2</sub>O (2:1, w/w), and c/c') EtOH. All fibres were conditioned with 0.17% commercial surfactant.
